# Supplementary material for: Informing metastatic colorectal cancer patients by quantifying multiple scenarios for survival time based on real‐life data
Source: PubMed Central journal article supplement — Int J Cancer. 2020 Jul 20;148(2):296–306. doi: 10.1002/ijc.33200 (PMC7754475; doi:10.1002/ijc.33200), 2020-07-20

## SUPPLEMENTARY MATERIAL

Informing metastatic colorectal cancer patients by quantifying multiple scenarios for survival time based on real-life data

P.A.H. Hamers MD, M.A.G. Elferink PhD, R.K. Stellato MSc, C.J.A. Punt MD PhD, A.M. May PhD, M. Koopman MD PhD, G.R. Vink MD PhD.

### Table of contents:

|                |                                                                                                                   |
|----------------|-------------------------------------------------------------------------------------------------------------------|
| Suppl Table 1  | Median relative survival per treatment strategy and 5-year relative survival                                      |
| Suppl Table 2  | Median age-standardized relative survival per treatment strategy and 5-year age-standardized relative survival    |
| Suppl Table 3  | Median OS and 5-year OS stratified by age at diagnosis                                                            |
| Suppl Table 4  | Summary of median OS as reported in mCRC patients participating in clinical trials on first-line systemic therapy |
| Suppl Figure 1 | KM observed OS / relative survival / age-standardized relative survival                                           |
| Suppl Figure 2 | Change in OS over time stratified by primary tumour location                                                      |
| Suppl Figure 3 | Change in OS over time stratified by age at diagnosis                                                             |

Supplementary Table 1. (1) Median relative survival in months (95% CI) per treatment strategy, and (2) 5-year relative survival of stage IV CRC patients diagnosed between 2008 and 2016.

|                                                               | Treatment strategy                                   | Year of diagnosis   |                     |                     |                     |                     |                     |                     |                     |                     |
|---------------------------------------------------------------|------------------------------------------------------|---------------------|---------------------|---------------------|---------------------|---------------------|---------------------|---------------------|---------------------|---------------------|
|                                                               |                                                      | 2008                | 2009                | 2010                | 2011                | 2012                | 2013                | 2014                | 2015                | 2016                |
| Median relative survival in months                            | Total stage IV population <sup>a</sup>               | 11.6<br>(10.8-12.5) | 11.6<br>(11.0-12.5) | 12.2<br>(11.2-13.1) | 12.8<br>(12.1-13.9) | 12.0<br>(11.3-12.9) | 13.2<br>(12.6-14.0) | 14.5<br>(13.8-15.2) | 14.5<br>(13.4-15.6) | 13.2<br>(12.6-14.3) |
|                                                               | No antitumor treatment <sup>b</sup>                  | 1.6<br>(1.4-1.8)    | 1.9<br>(1.7-2.1)    | 1.7<br>(1.4-1.9)    | 1.8<br>(1.5-2.0)    | 1.8<br>(1.6-2.1)    | 1.6<br>(1.4-1.9)    | 1.7<br>(1.5-2.1)    | 1.9<br>(1.7-2.2)    | 1.9<br>(1.7-2.1)    |
|                                                               | Any antitumour therapy <sup>c</sup>                  | 16.6<br>(15.7-17.7) | 16.5<br>(15.5-17.5) | 17.9<br>(16.8-18.8) | 18.0<br>(17.1-19.0) | 17.9<br>(16.6-18.9) | 18.6<br>(17.7-19.5) | 19.5<br>(18.1-20.7) | 19.9<br>(19.0-20.6) | 18.8<br>(17.6-19.8) |
|                                                               | Systemic therapy +/- PTR <sup>d</sup>                | 16.0<br>(15.2-17.1) | 15.0<br>(14.1-16.2) | 15.9<br>(14.8-17.1) | 15.1<br>(14.1-16.0) | 14.2<br>(13.4-15.0) | 14.9<br>(14.1-15.9) | 15.8<br>(14.8-16.8) | 15.8<br>(14.5-16.6) | 13.9<br>(13.2-14.8) |
|                                                               | Systemic therapy only <sup>e</sup>                   | 12.4<br>(11.5-13.6) | 12.0<br>(11.0-13.1) | 12.9<br>(11.9-13.7) | 11.7<br>(10.9-12.4) | 11.6<br>(10.8-12.3) | 12.0<br>(11.0-13.1) | 13.7<br>(12.7-14.6) | 12.8<br>(11.5-13.8) | 12.3<br>(11.1-13.1) |
|                                                               | Systemic therapy + PTR <sup>f</sup>                  | 21.9<br>(19.8-23.6) | 21.4<br>(19.4-23.8) | 20.5<br>(18.8-22.4) | 20.3<br>(19.1-22.2) | 19.3<br>(17.6-21.1) | 20.2<br>(18.7-22.5) | 21.6<br>(20.0-23.6) | 20.3<br>(19.1-21.8) | 19.7<br>(16.5-24.0) |
|                                                               | Metastasectomy/HIPEC + systemic therapy <sup>g</sup> | 57.1<br>(52.0-84.1) | 51.8<br>(40.6-74.9) | 53.6<br>(47.0-67.1) | 57.5<br>(53.3-75.6) | 61.2<br>(48.4-75.5) | 54.3<br>(48.6-69.8) | *                   | *                   | *                   |
|                                                               | Metastasectomy/HIPEC only <sup>h</sup>               | 32.9<br>(25.5-56.7) | 52.5<br>(34.5-91.7) | *                   | *                   | *                   | *                   | *                   | *                   | *                   |
| Percentage 5-year relative survival Total stage IV population | 11.2<br>(9.6-13.0)                                   | 10.8<br>(9.6-12.2)  | 11.8<br>(10.6-13.2) | 13.4<br>(12.1-14.8) | 12.2<br>(11.0-13.6) | 12.3<br>(11.0-13.6) | 15.2<br>(13.7-16.9) | *                   | *                   |                     |

\*Results not yet available because of limited follow-up time.

For explanation on the meaning of a,b,c,d,e,f,g,h see the caption of figure 2.

PTR: primary tumour resection. HIPEC: Hyperthermic Intraperitoneal Chemotherapy

Supplementary Table 2. (1) Median **age-standardized** relative survival in months (95% CI) per treatment strategy, and (2) 5-year relative survival of stage IV CRC patients diagnosed between 2008 and 2016.

|                                                               | Treatment strategy                                   | Year of diagnosis   |                     |                     |                     |                     |                     |                     |                     |                     |
|---------------------------------------------------------------|------------------------------------------------------|---------------------|---------------------|---------------------|---------------------|---------------------|---------------------|---------------------|---------------------|---------------------|
|                                                               |                                                      | 2008                | 2009                | 2010                | 2011                | 2012                | 2013                | 2014                | 2015                | 2016                |
| Median age-standardized relative survival in months           | Total stage IV population <sup>a</sup>               | 13.2<br>(11.4-15.5) | 13.1<br>(11.4-15.5) | 14.1<br>(12.4-16.8) | 14.6<br>(12.6-17.1) | 14.0<br>(11.9-16.5) | 14.3<br>(12.7-16.8) | 15.8<br>(14.1-18.0) | 16.0<br>(13.6-18.4) | 14.5<br>(12.6-16.6) |
|                                                               | No antitumor treatment <sup>b</sup>                  | 1.4<br>(1.0-2.3)    | 1.9<br>(1.3-2.8)    | 1.3<br>(1.3-2.5)    | 1.3<br>(0.9-2.9)    | 1.8<br>(1.3-2.8)    | 1.6<br>(1.0-3.1)    | 1.4<br>(0.9-3.3)    | 2.0<br>(1.2-3.3)    | 1.5<br>(1.0-3.0)    |
|                                                               | Any antitumour therapy <sup>c</sup>                  | 17.0<br>(14.9-19.3) | 17.0<br>(14.7-19.9) | 18.3<br>(15.7-20.9) | 18.4<br>(16.1-21.0) | 18.4<br>(16.1-20.4) | 18.6<br>(16.2-21.3) | 19.9<br>(17.2-22.4) | 20.1<br>(18.0-22.7) | 18.8<br>(16.3-21.4) |
|                                                               | Systemic therapy +/- PTR <sup>d</sup>                | 15.6<br>(13.4-18.1) | 15.1<br>(12.8-17.5) | 15.7<br>(13.7-18.6) | 14.6<br>(12.7-16.8) | 14.3<br>(12.6-17.6) | 14.3<br>(12.7-17.5) | 15.9<br>(14.1-18.0) | 15.6<br>(13.0-17.9) | 14.2<br>(12.5-16.3) |
|                                                               | Systemic therapy only <sup>e</sup>                   | 11.5<br>(9.0-15.1)  | 12.0<br>(9.8-15.0)  | 12.8<br>(10.4-15.6) | 11.2<br>(9.8-13.4)  | 11.9<br>(10.3-14.4) | 12.0<br>(10.3-14.9) | 14.2<br>(11.8-16.5) | 12.8<br>(10.3-15.9) | 12.5<br>(10.2-14.7) |
|                                                               | Systemic therapy + PTR <sup>f</sup>                  | 21.5<br>(17.2-26.2) | 21.6<br>(17.4-28.1) | 20.6<br>(17.4-27.3) | 20.3<br>(17.7-26.1) | 19.2<br>(16.0-26.2) | 19.1<br>(15.0-26.5) | 20.4<br>(15.5-26.1) | 20.4<br>(16.6-28.0) | 21.3<br>(11.2-33.0) |
|                                                               | Metastasectomy/HIPEC + systemic therapy <sup>g</sup> | *                   | *                   | *                   | *                   | *                   | *                   | *                   | *                   | *                   |
|                                                               | Metastasectomy/HIPEC only <sup>h</sup>               | *                   | *                   | *                   | *                   | *                   | *                   | *                   | *                   | *                   |
| Percentage 5-year relative survival Total stage IV population | 12.3<br>(9.0-16.8)                                   | 12.5<br>(9.6-16.4)  | 13.8<br>(10.8-17.7) | 14.5<br>(11.4-18.4) | 14.0<br>(10.8-18.0) | 13.7<br>(10.7-17.5) | 16.0<br>(12.6-20.3) | *                   | *                   |                     |

\*Results not yet available because of limited follow-up time.

For explanation on the meaning of a,b,c,d,e,f,g,h see the caption of figure 2.

PTR: primary tumour resection. HIPEC: Hyperthermic Intraperitoneal Chemotherapy

Supplementary Table 3. Median OS in months (95% CI) and 5-year OS (95% CI) of stage IV CRC patients diagnosed between 2008 and 2016 – stratified by age at diagnosis.

|                      | Age at diagnosis (years) | Year of diagnosis   |                     |                     |                     |                     |                     |                     |                     |                     |
|----------------------|--------------------------|---------------------|---------------------|---------------------|---------------------|---------------------|---------------------|---------------------|---------------------|---------------------|
|                      |                          | 2008                | 2009                | 2010                | 2011                | 2012                | 2013                | 2014                | 2015                | 2016                |
| Median OS in months  | 0-49                     | 18.9<br>(16.5-22.4) | 19.0<br>(15.5-24.4) | 21.1<br>(15.9-28.6) | 19.1<br>(16.8-23.3) | 19.7<br>(17.4-24.0) | 21.8<br>(17.4-25.1) | 22.0<br>(17.7-25.1) | 21.7<br>(18.2-25.1) | 17.4<br>(15.4-20.7) |
|                      | 50-59                    | 15.7<br>(13.8-18.4) | 19.4<br>(16.6-21.2) | 19.8<br>(17.7-21.7) | 18.5<br>(16.6-20.7) | 17.8<br>(14.6-19.8) | 17.4<br>(14.9-19.3) | 19.2<br>(16.6-21.4) | 18.4<br>(16.3-20.9) | 18.5<br>(16.2-20.9) |
|                      | 60-69                    | 14.8<br>(13.3-16.2) | 13.4<br>(12.0-15.2) | 14.2<br>(13.2-16.4) | 15.2<br>(13.7-17.1) | 14.5<br>(12.9-15.8) | 17.1<br>(15.1-18.5) | 17.0<br>(15.3-18.8) | 19.1<br>(17.4-20.4) | 15.7<br>(14.3-17.6) |
|                      | 70-79                    | 8.5<br>(7.6-10.0)   | 9.0<br>(7.9-10.3)   | 9.9<br>(8.8-11.0)   | 10.7<br>(9.6-11.9)  | 11.0<br>(9.7-12.0)  | 11.1<br>(9.9-12.5)  | 12.0<br>(10.8-13.2) | 10.9<br>(9.6-12.3)  | 11.6<br>(9.9-12.8)  |
|                      | 80+                      | 4.0<br>(3.4-4.6)    | 4.3<br>(3.7-5.1)    | 4.0<br>(3.5-4.9)    | 5.1<br>(4.1-5.9)    | 4.9<br>(4.2-5.8)    | 4.4<br>(3.8-5.6)    | 5.8<br>(5.2-6.8)    | 5.2<br>(4.1-6.0)    | 4.5<br>(3.9-5.2)    |
| Percentage 5-year OS | 0-49                     | 20.5<br>(15.4-27.3) | 22.1<br>(16.9-28.9) | 26.6<br>(20.8-33.9) | 19.3<br>(14.4-25.8) | 19.9<br>(14.9-26.5) | 19.8<br>(14.9-26.3) | 18.4<br>(13.4-25.2) | *                   | *                   |
|                      | 50-59                    | 11.2<br>(8.5-14.8)  | 14.2<br>(11.3-17.7) | 12.6<br>(9.8-16.1)  | 14.3<br>(11.4-17.9) | 16.9<br>(13.6-21.0) | 15.1<br>(12.3-18.7) | 18.0<br>(14.6-22.3) | *                   | *                   |
|                      | 60-69                    | 11.6<br>(9.6-14.0)  | 11.2<br>(9.2-13.6)  | 11.1<br>(9.2-13.3)  | 13.0<br>(11.0-15.4) | 12.9<br>(11.0-15.2) | 13.7<br>(11.7-16.0) | 16.3<br>(13.9-18.9) | *                   | *                   |
|                      | 70-79                    | 7.4<br>(4.8-9.3)    | 6.3<br>(4.8-8.2)    | 8.4<br>(6.8-10.4)   | 10.1<br>(8.3-12.2)  | 7.2<br>(5.7-9.1)    | 7.2<br>(5.7-9.1)    | 9.5<br>(7.7-11.7)   | *                   | *                   |
|                      | 80+                      | 2.8<br>(1.7-4.6)    | 1.7<br>(0.9-3.2)    | 2.7<br>(1.7-4.4)    | 3.2<br>(2.1-5.0)    | 3.1<br>(1.9-4.8)    | 2.2<br>(1.3-3.8)    | 3.9<br>(2.6-6.1)    | *                   | *                   |

\*Results not yet available because of limited follow-up time.  
OS: overall survival. CRC: colorectal cancer.

Supplementary Table 4. Summary table of median OS as reported in mCRC patients participating in clinical trials on first-line systemic therapy.

|                                        | <b>Hurwitz 2004</b>             | <b>CRYSTAL<br/>(Van Cutsem 2009)</b>  | <b>FIRE-3<br/>(Heinemann 2014)</b>                | <b>TRIBE<br/>(Cremolini 2015)</b>     | <b>CALGB<br/>(Venook 2017)</b>                    |
|----------------------------------------|---------------------------------|---------------------------------------|---------------------------------------------------|---------------------------------------|---------------------------------------------------|
| <b>Treatment arms</b>                  | IFL-bevacizumab vs. IFL+placebo | FOLFIRI+cetuximab vs. FOLFIRI         | FOLFIRI+cetuximab vs. FOLFIRI+bevacizumab         | FOLFOXIRI-B vs. FOLFIRI-B             | mFOLFOX6/FOLFIRI plus: cetuximab vs. bevacizumab  |
| <b>Inclusion period</b>                | 2000-2002                       | 2004-2005                             | 2007-2012                                         | 2008-2011                             | 2005-2012                                         |
| <b>Median OS in months</b>             | 20.3 vs. 15.6                   | 19.9 vs. 18.6                         | 28.7 vs. 25.0                                     | 29.8 vs. 25.8                         | 30.0 vs. 29.0                                     |
| <b>Age of study population</b>         |                                 |                                       |                                                   |                                       |                                                   |
| Mean                                   | 59.5 vs. 59.2                   | -                                     | -                                                 | -                                     | -                                                 |
| Median (IQR)                           | -                               | 61 (range 22-82) vs. 61 (range 19-84) | 64.0 (range 38.0-79.0) vs. 65.0 (range 27.0-76.0) | 60.5 (52.0-67.5) vs. 60.0 (53.0-67.0) | 59.2 (range 20.8-89.5) vs. 59.0 (range 21.8-85.0) |
| <b>WHO PS (%)</b>                      |                                 |                                       |                                                   |                                       |                                                   |
| 0                                      | 58 vs. 55                       | 55.1 vs. 53.1                         | 52 vs. 54                                         | 90 vs. 89                             | 57.6 vs. 58.0                                     |
| 1                                      | 41 vs. 44                       | 41.1 vs. 43.4                         | 46 vs. 45                                         | -                                     | 42.4 vs. 41.7                                     |
| 2                                      | <1 vs. <1                       | 3.5 vs. 3.5                           | 2 vs. 1                                           | -                                     | 0 vs. 0.4                                         |
| 1-2                                    | -                               | -                                     | -                                                 | 10 vs. 11                             | -                                                 |
| <b>Primary tumour site (%)</b>         |                                 |                                       |                                                   |                                       |                                                   |
| - Colon                                | 77 vs. 81                       | 59.8 vs. 60.4                         | 57 vs. 60                                         | -                                     | -                                                 |
| - Rectal                               | 23 vs. 19                       | 38.1 vs. 37.6                         | 39 vs. 36                                         | -                                     | -                                                 |
| - Left colon or rectum                 | -                               | -                                     | -                                                 | 60 vs. 70                             | 61.4 vs. 57.9                                     |
| - Right colon                          | -                               | -                                     | -                                                 | 35 vs. 24                             | 23.9 vs. 25.4                                     |
| - Transverse colon                     | -                               | -                                     | -                                                 | -                                     | 5.4 vs. 5.5                                       |
| - Unknown                              | -                               | 2.2 vs. 2.0                           | 2 vs. 0                                           | 5 vs. 6                               | 9.2 vs. 9.3                                       |
| <b>Molecular pathology</b>             | X                               | X                                     |                                                   |                                       |                                                   |
| RASwt                                  |                                 |                                       | 58%                                               | 19% vs. 9%                            | 100%                                              |
| RAS mutation                           |                                 |                                       | 11%                                               | 50% vs. 23%                           | -                                                 |
| BRAF mutation                          |                                 |                                       | -                                                 | 6% vs. 5%                             | -                                                 |
| <b>Number of metastatic sites* (%)</b> |                                 |                                       |                                                   |                                       |                                                   |
| 1                                      | 37 vs. 39                       | -                                     | 40 vs. 42                                         | -                                     | -                                                 |
| >1                                     | 63 vs. 61                       | -                                     | -                                                 | -                                     | -                                                 |
| 1-2                                    | -                               | 83.5 vs. 86.1                         | -                                                 | -                                     | -                                                 |
| ≥2                                     | -                               | -                                     | 59 vs 58                                          | -                                     | -                                                 |
| Liver only                             | -                               | 20.4 vs. 22.4                         | 31 vs 32                                          | -                                     | 32.3 vs. 29.5                                     |

\*at randomization.

OS: overall survival. PS: performance status. mCRC: metastatic colorectal cancer. IQR: interquartile range.

Multiple scenarios for survival of real-life mCRC patients

|                                        | <b>TRIBE2<br/>(Cremolini 2020)</b>                                             |
|----------------------------------------|--------------------------------------------------------------------------------|
| <b>Treatment arms</b>                  | FOLFOXIRI-B upfront and after progression vs. mFOLFOX6-B followed by FOLFIRI-B |
| <b>Inclusion period</b>                | 2015-2017                                                                      |
| <b>Median OS in months</b>             | 27.4 vs. 22.5                                                                  |
| <b>Age of study population</b>         |                                                                                |
| Mean                                   | -                                                                              |
| Median (IQR)                           | 60 (53-67) vs. 61 (52-67)                                                      |
| <b>WHO PS (%)</b>                      |                                                                                |
| 0                                      | 86 vs. 85                                                                      |
| 1                                      | -                                                                              |
| 2                                      | -                                                                              |
| 1-2                                    | 14 vs. 15                                                                      |
| <b>Primary tumour site (%)</b>         |                                                                                |
| - Colon                                | -                                                                              |
| - Rectal                               | -                                                                              |
| - Left colon or rectum                 | 62 vs. 62                                                                      |
| - Right colon                          | 38 vs. 38                                                                      |
| - Transverse colon                     | -                                                                              |
| - Unknown                              | -                                                                              |
| <b>Molecular pathology (%)</b>         |                                                                                |
| RAS and BRAF wildtype                  | 22 vs. 21                                                                      |
| RAS mutation                           | 63 vs. 65                                                                      |
| BRAF mutation                          | 10 vs. 10                                                                      |
| Missing                                | 5 vs. 5                                                                        |
| <b>Number of metastatic sites* (%)</b> |                                                                                |
| 1                                      | 45 vs. 37                                                                      |
| >1                                     | 55 vs. 63                                                                      |
| 1-2                                    | -                                                                              |
| ≥2                                     | -                                                                              |
| Liver only                             | 31 vs. 28                                                                      |

IQR: interquartile range.

Supplementary Figure 1. Kaplan–Meier estimates of Observed overall survival, Relative survival, and Age–standardized relative survival.

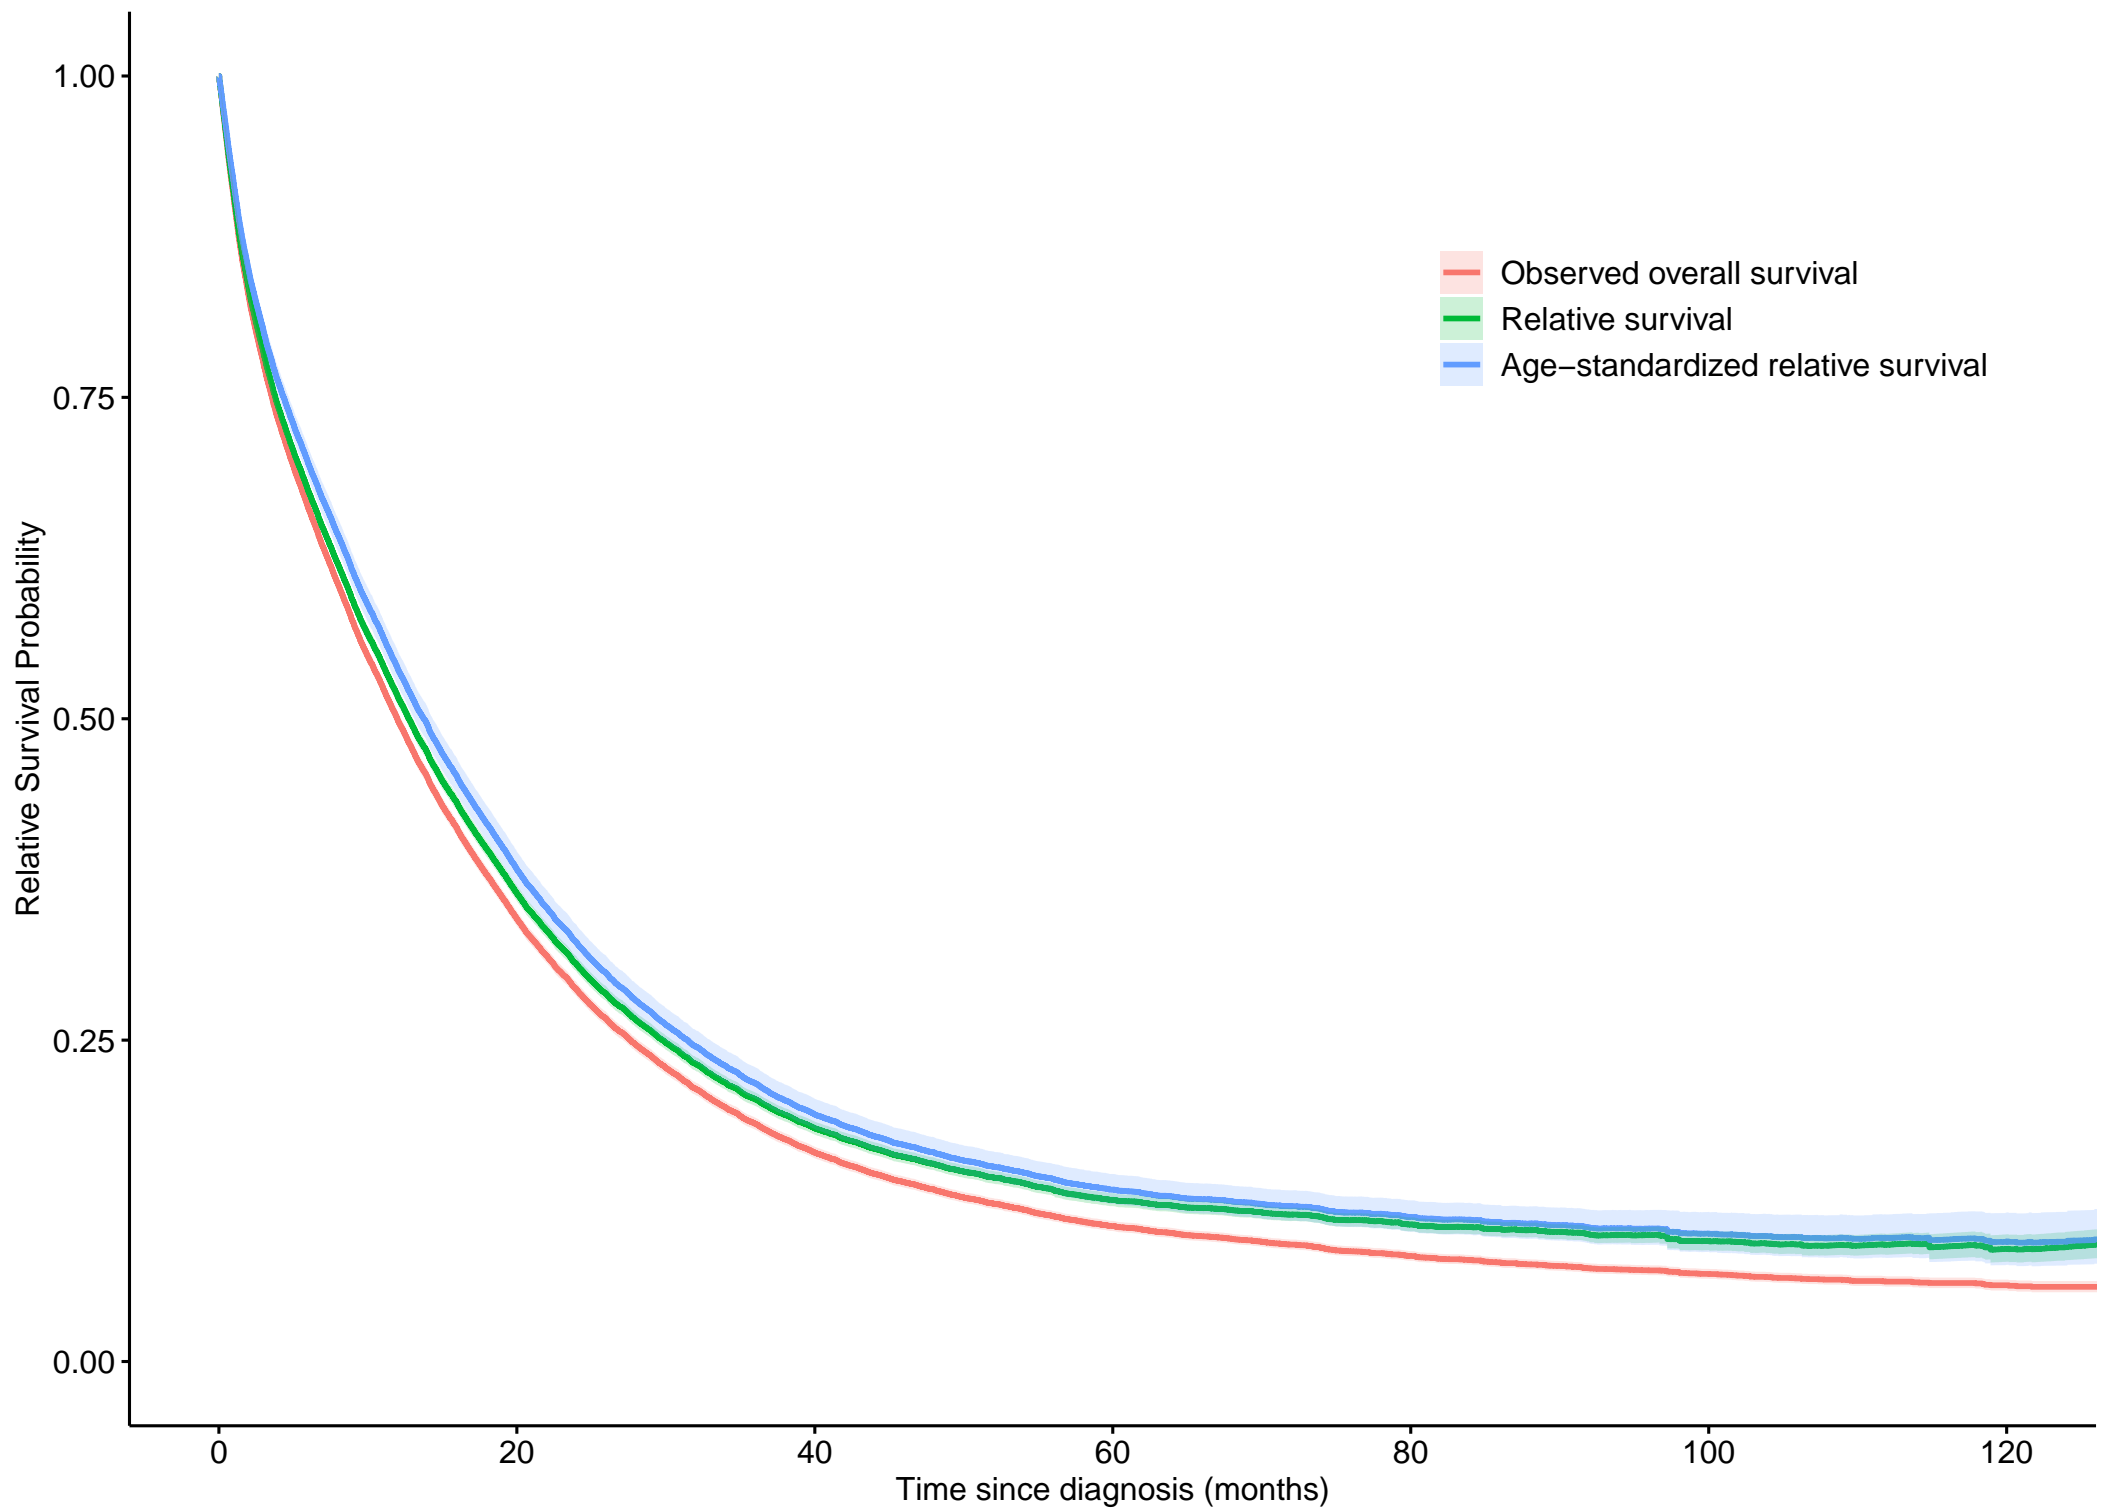

Supplementary Figure 2.  
 Change in OS of stage IV CRC patients over time for different scenarios stratified by primary tumour location

**Right-sided colon**

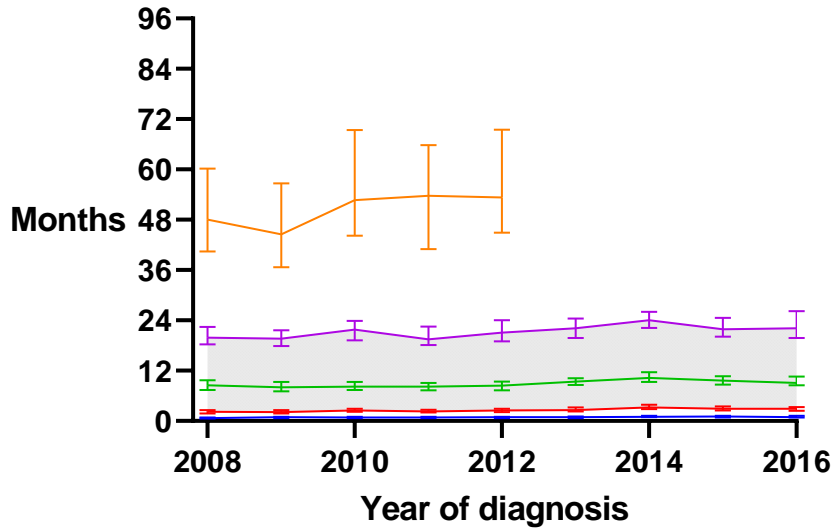

**Left-sided colon**

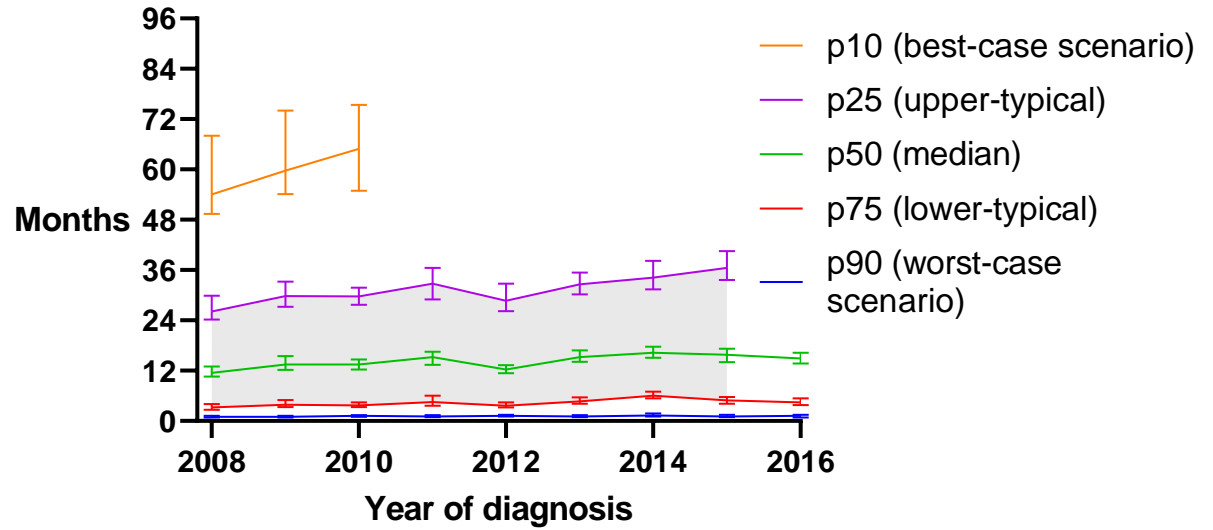

**Rectum**

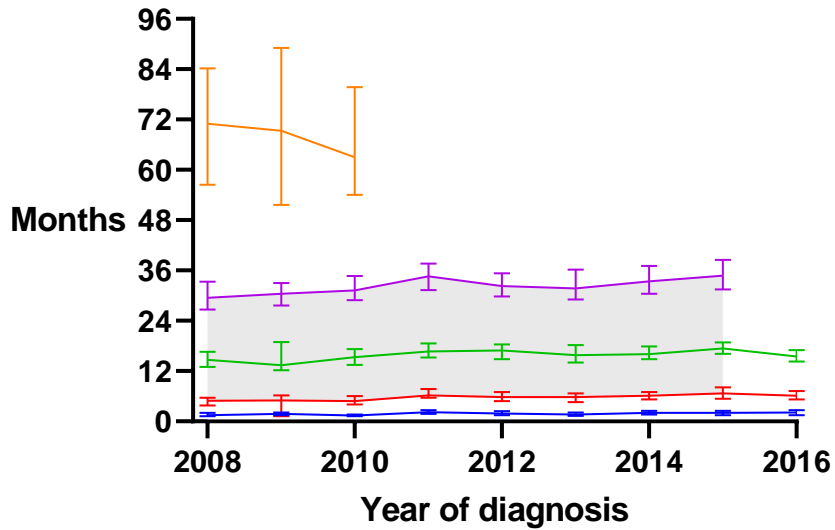

**Location primary tumour unknown**

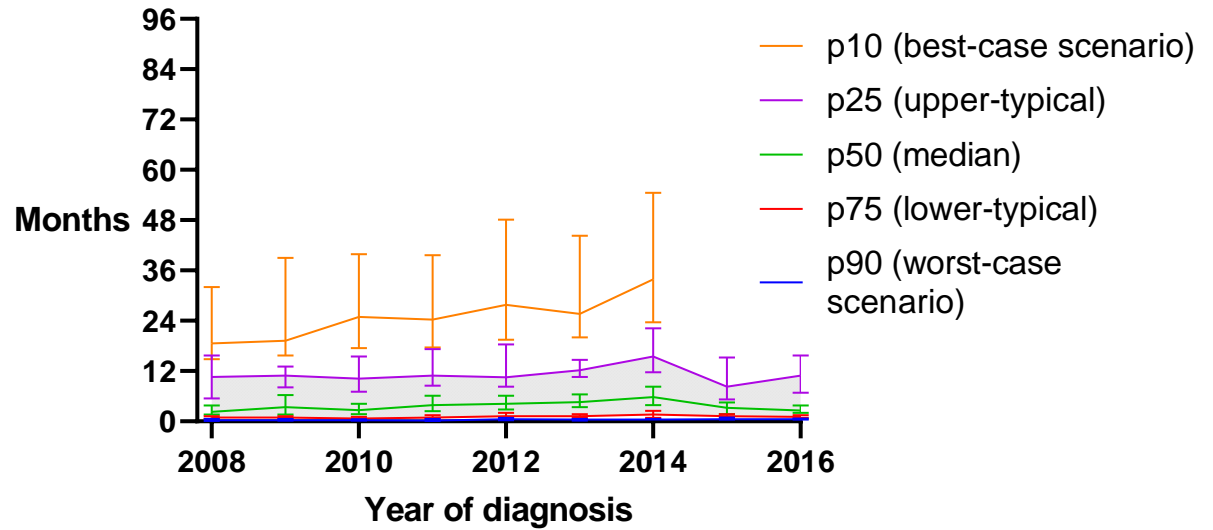



### Supplementary Figure 3.

Change in OS of stage IV CRC patients over time for different scenarios stratified by age at diagnosis

**Age 0-49**

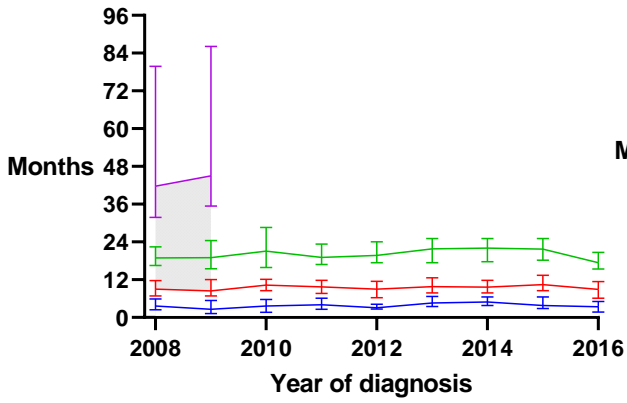

**Age 50-59**

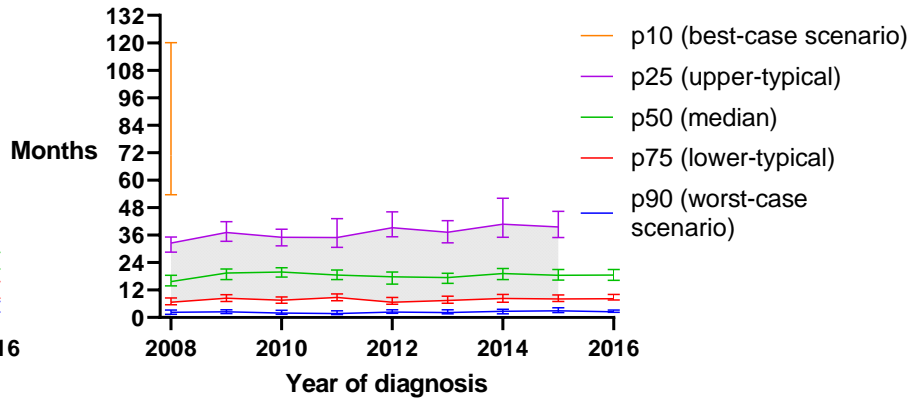

**Age 60-69**

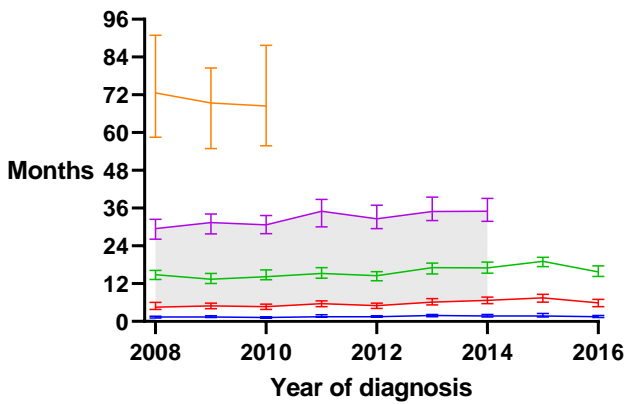

**Age 70-79**

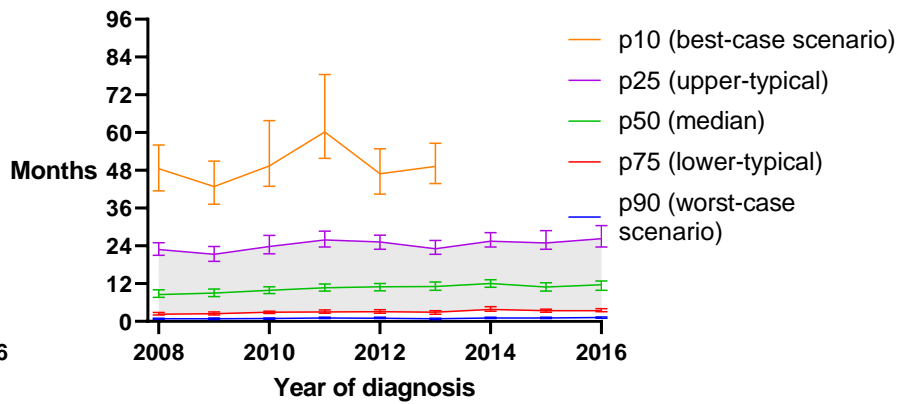

**Age 80+**

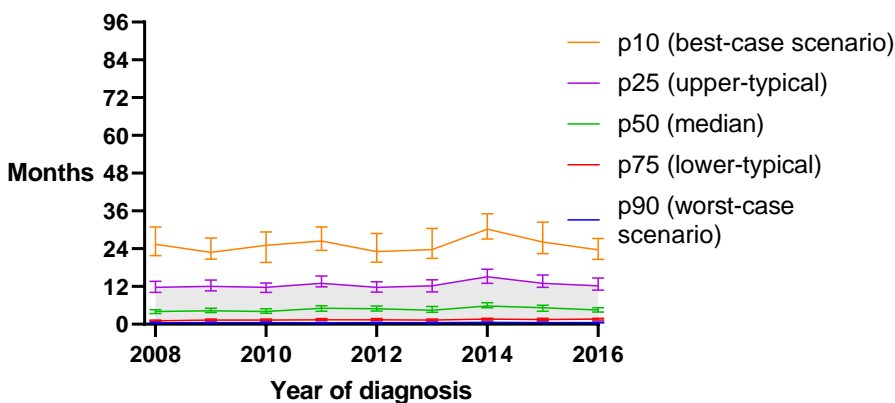

Supplement: IJC-148-296-s001.pdf [file IJC-148-296-s001.pdf]
